# Supplementary material for: Adverse events profile of oral corticosteroids among asthma patients in the UK: cohort study with a nested case-control analysis
Source: PubMed Central journal article supplement (PMC5921395; doi:10.1186/s12931-018-0742-y), 2018-04-27
Supplement: 12931_2018_742_MOESM2_ESM.pdf [file 12931_2018_742_MOESM2_ESM.pdf]

## Additional file 2

### Flowchart study population:

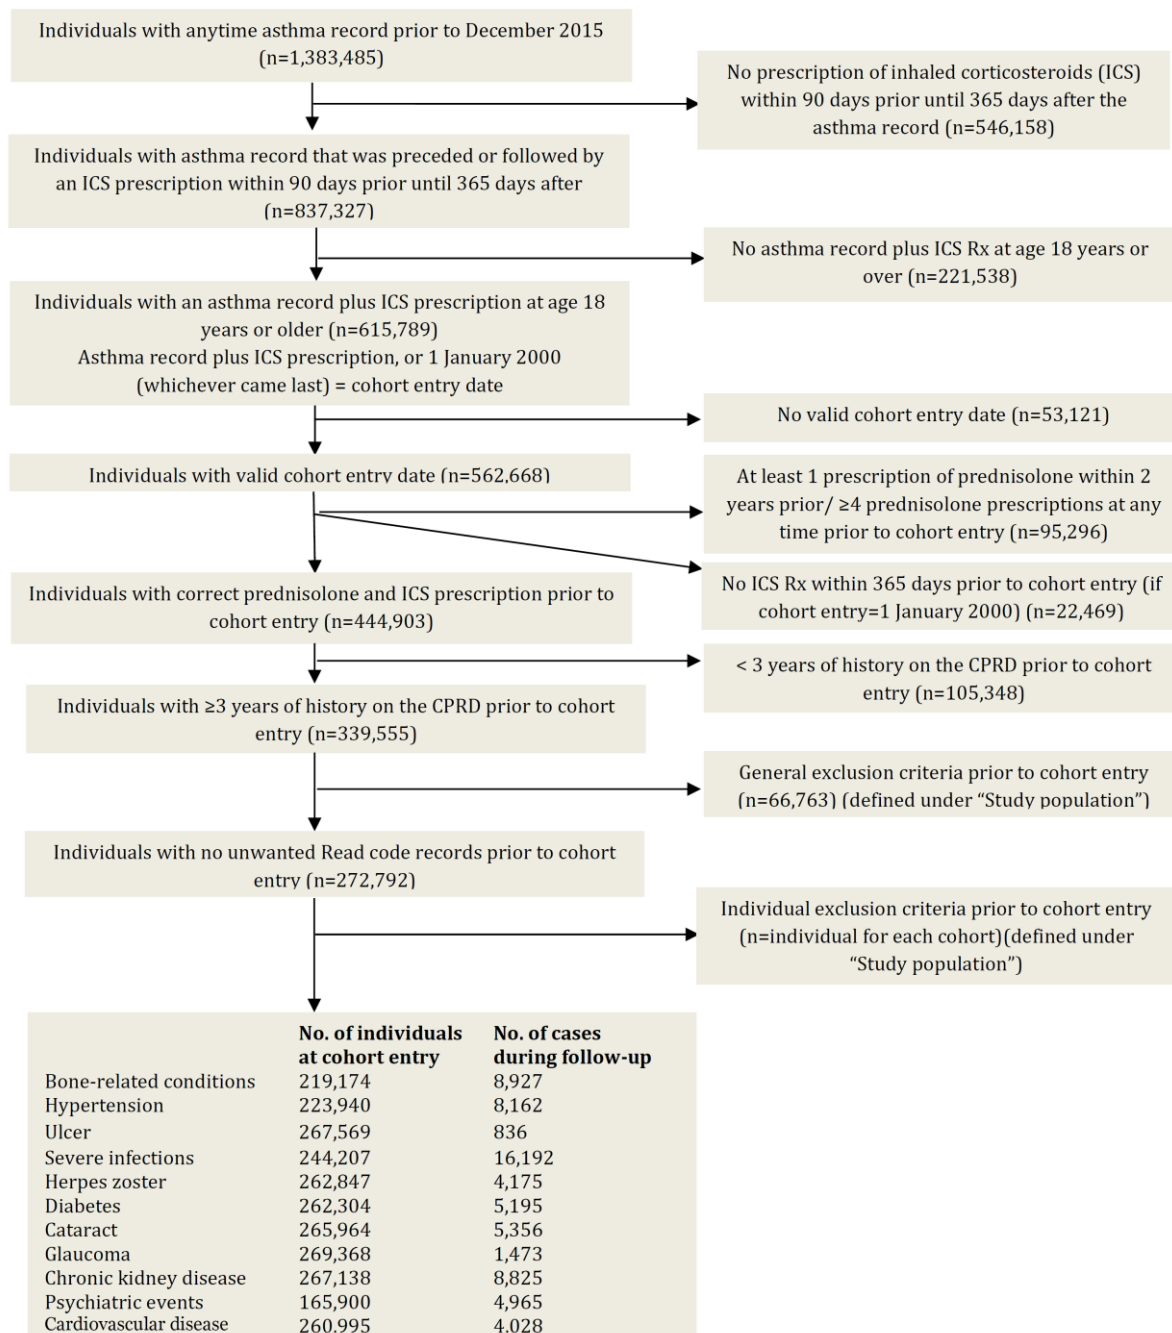

**Detailed information on characteristics and co-medication of cases and controls for each outcome at the index date:**

Characteristics and co-medication of cases with **bone-related conditions** and matched controls at the index date

|                                                         | <b>No. of Cases (%)<br/>(N=8,907)</b> | <b>No. of Controls (%)<br/>(N=35,445)</b> | <b>Crude OR</b> | <b>95% CI</b> |
|---------------------------------------------------------|---------------------------------------|-------------------------------------------|-----------------|---------------|
| Male                                                    | 2,752 (30.9)                          | 10,956 (30.9)                             | NA              | NA            |
| Female                                                  | 6,155 (69.1)                          | 24,489 (69.1)                             | NA              | NA            |
| <b>Age</b>                                              |                                       |                                           |                 |               |
| 18-39                                                   | 2,321 (26.1)                          | 9,263 (26.1)                              | NA              | NA            |
| 40-59                                                   | 2,713 (30.5)                          | 10,858 (30.6)                             | NA              | NA            |
| 60-79                                                   | 2,947 (33.1)                          | 11,781 (33.2)                             | NA              | NA            |
| ≥80                                                     | 926 (10.4)                            | 3,543 (10.0)                              | NA              | NA            |
| <b>Smoking status</b>                                   |                                       |                                           |                 |               |
| non                                                     | 4,495 (50.5)                          | 18,672 (52.7)                             | 1.00            | reference     |
| current                                                 | 1,438 (16.1)                          | 5,020 (14.2)                              | 1.20            | 1.12-1.29     |
| ex                                                      | 2,767 (31.1)                          | 10,935 (30.9)                             | 1.05            | 0.99-1.10     |
| unknown                                                 | 207 (2.3)                             | 818 (2.3)                                 | 1.06            | 0.90-1.25     |
| <b>Alcohol consumption<br/>(average units per week)</b> |                                       |                                           |                 |               |
| none                                                    | 4,231 (47.5)                          | 16,714 (47.2)                             | 1.00            | reference     |
| <14                                                     | 2,786 (31.3)                          | 11,351 (32.0)                             | 0.98            | 0.92-1.03     |
| ≥14                                                     | 862 (9.7)                             | 3,150 (8.9)                               | 1.09            | 1.00-1.19     |
| unknown                                                 | 1,028 (11.5)                          | 4,230 (11.9)                              | 0.96            | 0.88-1.04     |
| <b>Body mass index, kg/m<sup>2</sup></b>                |                                       |                                           |                 |               |
| <18.5                                                   | 197 (2.2)                             | 612 (1.7)                                 | 1.17            | 0.99-1.38     |
| 18.5-24.9                                               | 3,006 (33.8)                          | 10,850 (30.6)                             | 1.00            | reference     |
| 25-29.9                                                 | 2,633 (29.6)                          | 10,971 (31.0)                             | 0.86            | 0.81-0.91     |
| ≥30                                                     | 2,138 (24.0)                          | 9,327 (26.3)                              | 0.82            | 0.77-0.87     |
| unknown                                                 | 933 (10.5)                            | 3,685 (10.4)                              | 0.93            | 0.85-1.02     |
| <b>Concomitant<sup>a</sup> drug use</b>                 |                                       |                                           |                 |               |
| SABA                                                    | 7,646 (85.8)                          | 29,977 (84.6)                             | 1.10            | 0.92-1.32     |
| SAMA                                                    | 331 (3.7)                             | 1,154 (3.3)                               | 1.17            | 1.03-1.32     |
| ICS (mono preparations)                                 | 6,353 (71.3)                          | 25,892 (73.1)                             | 0.96            | 0.86-1.08     |
| ICS+LABA                                                | 3,048 (34.2)                          | 11,350 (32.0)                             | 1.13            | 1.07-1.20     |
| Asthma add-on therapy <sup>b</sup>                      | 420 (4.7)                             | 1,511 (4.3)                               | 1.13            | 1.01-1.26     |
| Platelet aggregation inhibitors                         | 1,226 (13.8)                          | 4,343 (12.3)                              | 1.18            | 1.09-1.27     |
| Anticoagulants                                          | 862 (2.4)                             | 239 (2.7)                                 | 1.10            | 0.95-1.27     |
| Proton pump inhibitors                                  | 2,042 (22.9)                          | 6,769 (19.1)                              | 1.34            | 1.26-1.43     |
| Immunosuppressants <sup>c</sup>                         | 25 (0.3)                              | 69 (0.2)                                  | 1.45            | 0.92-2.30     |
| Bisphosphonates                                         | 231 (2.6)                             | 287 (0.8)                                 | 3.30            | 2.76-3.94     |
| Vitamin D                                               | 468 (5.3)                             | 1,030 (2.9)                               | 1.90            | 1.69-2.13     |
| <b>Charlson Comorbidity Index</b>                       |                                       |                                           |                 |               |
| Median (25% perc./75% perc./range)                      | 1 (1/1/8)                             | 1 (1/1/10)                                | NA              | NA            |
| <b>Charlson Comorbidity Index (categories)</b>          |                                       |                                           |                 |               |
| 0                                                       | 161 (1.8)                             | 745 (2.1)                                 | 1.00            | reference     |
| 1-3                                                     | 8,369 (94.0)                          | 33,443 (94.4)                             | 1.18            | 1.01-1.37     |
| 4-6                                                     | 349 (3.9)                             | 1,185 (3.3)                               | 1.38            | 1.14-1.67     |
| 7-10                                                    | 28 (0.3)                              | 72 (0.2)                                  | 1.80            | 1.18-2.74     |
| <b>Number of prescriptions ICS prior</b>                |                                       |                                           |                 |               |
| Median (25% perc./75% perc./range)                      | 30 (12/58/383)                        | 29 (12/56/361)                            | NA              | NA            |

Characteristics and co-medication of cases with **hypertension** and matched controls at the index date

|                                                         | No. of Cases (%)<br>(N=8,148) | No. of Controls (%)<br>(N=32,431) | Crude OR | 95% CI    |
|---------------------------------------------------------|-------------------------------|-----------------------------------|----------|-----------|
| Male                                                    | 3,469 (42.6)                  | 13,790 (42.5)                     | NA       | NA        |
| Female                                                  | 4,679 (57.4)                  | 18,641 (57.5)                     | NA       | NA        |
| <b>Age</b>                                              |                               |                                   |          |           |
| 18-39                                                   | 533 (6.5)                     | 2,138 (6.6)                       | NA       | NA        |
| 40-59                                                   | 3,607 (44.3)                  | 14,400 (44.4)                     | NA       | NA        |
| 60-79                                                   | 3,582 (44.0)                  | 14,316 (44.1)                     | NA       | NA        |
| ≥80                                                     | 426 (5.2)                     | 1,577 (4.9)                       | NA       | NA        |
| <b>Smoking status</b>                                   |                               |                                   |          |           |
| non                                                     | 3,966 (48.7)                  | 16,377 (50.5)                     | 1        | reference |
| current                                                 | 994 (12.2)                    | 4,265 (13.1)                      | 0.96     | 0.89-1.04 |
| ex                                                      | 3,015 (37.0)                  | 10,923 (33.7)                     | 1.15     | 1.08-1.21 |
| unknown                                                 | 173 (2.1)                     | 866 (2.7)                         | 0.81     | 0.68-0.96 |
| <b>Alcohol consumption<br/>(average units per week)</b> |                               |                                   |          |           |
| none                                                    | 3,766 (46.2)                  | 13,661 (42.1)                     | 1        | reference |
| <14                                                     | 2,750 (33.8)                  | 11,578 (35.7)                     | 0.86     | 0.82-0.91 |
| ≥14                                                     | 1,171 (14.4)                  | 4,026 (12.4)                      | 1.06     | 0.98-1.14 |
| unknown                                                 | 461 (5.7)                     | 3,166 (9.8)                       | 0.53     | 0.47-0.58 |
| <b>Body mass index, kg/m<sup>2</sup></b>                |                               |                                   |          |           |
| <18.5                                                   | 51 (0.6)                      | 360 (1.1)                         | 0.87     | 0.65-1.17 |
| 18.5-24.9                                               | 1,754 (21.5)                  | 10,967 (33.8)                     | 1        | reference |
| 25-29.9                                                 | 2,844 (34.9)                  | 11,424 (35.2)                     | 1.57     | 1.47-1.68 |
| ≥30                                                     | 2,970 (36.5)                  | 6,635 (20.5)                      | 2.92     | 2.72-3.12 |
| unknown                                                 | 529 (6.5)                     | 3,045 (9.4)                       | 1.05     | 0.95-1.17 |
| <b>Concomitant<sup>a</sup> drug use</b>                 |                               |                                   |          |           |
| SABA                                                    | 6,832 (83.9)                  | 26,526 (81.8)                     | 1.18     | 1.00-0.39 |
| SAMA                                                    | 312 (3.8)                     | 1,181 (3.6)                       | 1.06     | 0.93-1.21 |
| ICS (mono preparations)                                 | 6,140 (75.4)                  | 24,504 (75.6)                     | 1.08     | 0.95-1.23 |
| ICS+LABA                                                | 2,469 (30.3)                  | 9,604 (29.6)                      | 1.04     | 0.98-1.11 |
| Asthma add-on therapy <sup>b</sup>                      | 346 (4.3)                     | 1,304 (4.0)                       | 1.06     | 0.94-1.20 |
| Platelet aggregation inhibitors                         | 723 (8.9)                     | 2,297 (7.1)                       | 1.31     | 1.19-1.43 |
| Anticoagulants                                          | 110 (1.4)                     | 474 (1.5)                         | 0.91     | 0.74-1.13 |
| Proton pump inhibitors                                  | 1,714 (21.0)                  | 5,681 (17.5)                      | 1.27     | 1.20-1.36 |
| Immunosuppressants <sup>c</sup>                         | 15 (0.2)                      | 80 (0.3)                          | 0.74     | 0.43-1.29 |
| Bisphosphonates                                         | 188 (2.3)                     | 911 (2.8)                         | 0.80     | 0.68-0.94 |
| Vitamin D                                               | 287 (3.5)                     | 1,168 (3.6)                       | 0.96     | 0.84-1.10 |
| <b>Charlson Comorbidity Index</b>                       |                               |                                   |          |           |
| Median (25% perc./75% perc./range)                      | 1 (1/1/8)                     | 1 (1/1/7)                         | NA       | NA        |
| <b>Charlson Comorbidity Index<br/>(categories)</b>      |                               |                                   |          |           |
| 0                                                       | 219 (2.7)                     | 844 (2.6)                         | 1.00     | reference |
| 1-3                                                     | 7,794 (95.7)                  | 31,216 (96.3)                     | 0.97     | 0.85-1.11 |
| 4-6                                                     | 131 (1.6)                     | 367 (1.1)                         | 1.39     | 1.10-1.74 |
| 7-8                                                     | X                             | X                                 | NA       | NA        |

Characteristics and co-medication of cases with **peptic or esophageal ulcer** and matched controls at the index date

|                                                         | No. of Cases (%)<br>(N=835) | No. of Controls (%)<br>(N=3,328) | Crude OR | 95% CI    |
|---------------------------------------------------------|-----------------------------|----------------------------------|----------|-----------|
| Male                                                    | 332 (39.8)                  | 1,316 (39.5)                     | NA       | NA        |
| Female                                                  | 503 (60.2)                  | 2,012 (60.5)                     | NA       | NA        |
| <b>Age</b>                                              |                             |                                  |          |           |
| 18-39                                                   | 87 (10.4)                   | 343 (10.3)                       | NA       | NA        |
| 40-59                                                   | 239 (28.6)                  | 966 (29.0)                       | NA       | NA        |
| 60-79                                                   | 359 (43.0)                  | 1,435 (43.1)                     | NA       | NA        |
| ≥80                                                     | 150 (18.0)                  | 584 (17.6)                       | NA       | NA        |
| <b>Smoking status</b>                                   |                             |                                  |          |           |
| non                                                     | 363 (43.5)                  | 1,616 (48.6)                     | 1.00     | reference |
| current                                                 | 141 (16.9)                  | 379 (11.4)                       | 1.70     | 1.35-2.13 |
| ex                                                      | 316 (37.8)                  | 1,264 (38.0)                     | 1.11     | 0.93-1.32 |
| unknown                                                 | 15 (1.8)                    | 69 (2.1)                         | 0.95     | 0.53-1.70 |
| <b>Alcohol consumption<br/>(average units per week)</b> |                             |                                  |          |           |
| none                                                    | 440 (52.7)                  | 1,537 (46.2)                     | 1.00     | reference |
| <14                                                     | 246 (29.5)                  | 1,163 (35.0)                     | 0.73     | 0.62-0.87 |
| ≥14                                                     | 97 (11.6)                   | 350 (10.5)                       | 0.96     | 0.74-1.25 |
| unknown                                                 | 52 (6.2)                    | 278 (8.4)                        | 0.64     | 0.47-0.88 |
| <b>Body mass index, kg/m<sup>2</sup></b>                |                             |                                  |          |           |
| <18.5                                                   | 17 (2.0)                    | 37 (1.1)                         | 1.98     | 1.09-3.58 |
| 18.5-24.9                                               | 242 (29.0)                  | 1,032 (31.0)                     | 1.00     | reference |
| 25-29.9                                                 | 294 (35.2)                  | 1,120 (33.7)                     | 1.13     | 0.93-1.37 |
| ≥30                                                     | 230 (27.5)                  | 863 (25.9)                       | 1.16     | 0.94-1.42 |
| unknown                                                 | 52 (6.2)                    | 276 (8.3)                        | 0.79     | 0.57-1.10 |
| <b>Concomitant<sup>a</sup> drug use</b>                 |                             |                                  |          |           |
| SABA                                                    | 691 (82.8)                  | 2,755 (82.8)                     | 0.94     | 0.59-1.49 |
| SAMA                                                    | 50 (6.0)                    | 185 (5.6)                        | 1.10     | 0.79-1.53 |
| ICS (mono preparations)                                 | 604 (72.3)                  | 2,522 (75.8)                     | 1.00     | 0.67-1.51 |
| ICS+LABA                                                | 283 (33.9)                  | 993 (29.8)                       | 1.26     | 1.06-1.51 |
| Asthma add-on therapy <sup>b</sup>                      | 47 (5.6)                    | 106 (3.2)                        | 1.83     | 1.29-2.61 |
| Platelet aggregation inhibitors                         | 245 (29.3)                  | 641 (19.3)                       | 2.05     | 1.69-2.50 |
| Anticoagulants                                          | 57 (6.8)                    | 123 (3.7)                        | 1.96     | 1.41-2.73 |
| Proton pump inhibitors                                  | 388 (46.5)                  | 708 (21.3)                       | 3.93     | 3.29-4.70 |
| Immunosuppressants <sup>c</sup>                         | X                           | 7 (0.2)                          | NA       | NA        |
| Bisphosphonates                                         | 51 (6.1)                    | 125 (3.8)                        | 1.74     | 1.23-2.46 |
| Vitamin D                                               | 71 (8.5)                    | 175 (5.3)                        | 1.78     | 1.32-2.41 |
| <b>Charlson Comorbidity Index</b>                       |                             |                                  |          |           |
| Median (25% perc./75% perc./range)                      | 1 (1/2/12)                  | 1 (1/1/9)                        | NA       | NA        |
| <b>Charlson Comorbidity Index (categories)</b>          |                             |                                  |          |           |
| 0                                                       | 16 (1.9)                    | 77 (2.3)                         | 1.00     | reference |
| 1-3                                                     | 743 (89.0)                  | 3,072 (92.3)                     | 1.20     | 0.71-2.03 |
| 4-6                                                     | 71 (8.5)                    | 169 (5.1)                        | 2.14     | 1.19-3.84 |
| 7-12                                                    | 5 (0.6)                     | 10 (0.3)                         | 2.54     | 0.93-6.99 |
| <b>Number of prescriptions ICS prior</b>                |                             |                                  |          |           |
| Median (25% perc./75% perc./range)                      | 35 (15/66/312)              | 33 (14/64/281)                   | NA       | NA        |

Characteristics and co-medication of cases with **severe infections** and matched controls at the index date

|                                                         | No. of Cases (%)<br>(N=16,160) | No. of Controls (%)<br>(N=64,316) | Crude OR | 95% CI    |
|---------------------------------------------------------|--------------------------------|-----------------------------------|----------|-----------|
| Male                                                    | 5,223 (32.3)                   | 20,709 (32.2)                     | NA       | NA        |
| Female                                                  | 10,937 (67.7)                  | 43,607 (67.8)                     | NA       | NA        |
| <b>Age</b>                                              |                                |                                   |          |           |
| 18-39                                                   | 4,976 (30.8)                   | 19,901 (30.9)                     | NA       | NA        |
| 40-59                                                   | 5,084 (31.5)                   | 20,337 (31.6)                     | NA       | NA        |
| 60-79                                                   | 4,629 (28.6)                   | 18,499 (28.8)                     | NA       | NA        |
| ≥80                                                     | 1,471 (9.1)                    | 5,579 (8.7)                       | NA       | NA        |
| <b>Smoking status</b>                                   |                                |                                   |          |           |
| non                                                     | 7,457 (46.1)                   | 33,128 (51.1)                     | 1.00     | reference |
| current                                                 | 2,981 (18.5)                   | 9,512 (14.8)                      | 1.41     | 1.34-1.48 |
| ex                                                      | 5,479 (33.9)                   | 20,441 (31.8)                     | 1.19     | 1.14-1.24 |
| unknown                                                 | 243 (1.5)                      | 1,235 (1.9)                       | 0.86     | 0.74-0.99 |
| <b>Alcohol consumption<br/>(average units per week)</b> |                                |                                   |          |           |
| none                                                    | 8,050 (49.8)                   | 29,212 (45.4)                     | 1.00     | reference |
| <14                                                     | 5,012 (31.0)                   | 21,137 (32.9)                     | 0.86     | 0.82-0.89 |
| ≥14                                                     | 1,450 (9.0)                    | 6,400 (10.0)                      | 0.81     | 0.76-0.86 |
| unknown                                                 | 1,648 (10.2)                   | 7,567 (11.8)                      | 0.77     | 0.73-0.82 |
| <b>Body mass index, kg/m<sup>2</sup></b>                |                                |                                   |          |           |
| <18.5                                                   | 345 (2.1)                      | 1,115 (1.7)                       | 1.33     | 1.18-1.51 |
| 18.5-24.9                                               | 4,730 (29.3)                   | 20,861 (32.4)                     | 1.00     | reference |
| 25-29.9                                                 | 4,883 (30.2)                   | 19,793 (30.8)                     | 1.10     | 1.05-1.15 |
| ≥30                                                     | 4,964 (30.7)                   | 16,182 (25.2)                     | 1.38     | 1.32-1.45 |
| unknown                                                 | 1,238 (7.7)                    | 6,365 (9.9)                       | 0.82     | 0.76-0.88 |
| <b>Concomitant<sup>a</sup> drug use</b>                 |                                |                                   |          |           |
| SABA                                                    | 14,133 (87.5)                  | 54,432 (84.6)                     | 1.37     | 1.19-1.58 |
| SAMA                                                    | 694 (4.3)                      | 1,598 (2.5)                       | 1.84     | 1.68-2.02 |
| ICS (mono preparations)                                 | 11,211 (69.4)                  | 46,924 (73.0)                     | 0.90     | 0.83-0.97 |
| ICS+LABA                                                | 6,145 (38.0)                   | 20,649 (32.1)                     | 1.38     | 1.33-1.44 |
| Asthma add-on therapy <sup>b</sup>                      | 942 (5.8)                      | 2,509 (3.9)                       | 1.56     | 1.45-1.69 |
| Platelet aggregation inhibitors                         | 2,570 (15.9)                   | 6,938 (10.8)                      | 1.84     | 1.74-1.94 |
| Anticoagulants                                          | 632 (3.9)                      | 1,299 (2.0)                       | 2.04     | 1.85-2.26 |
| Proton pump inhibitors                                  | 4,458 (27.6)                   | 11,064 (17.2)                     | 2.13     | 2.03-2.22 |
| Immunosuppressants <sup>c</sup>                         | 61 (0.4)                       | 84 (0.1)                          | 2.95     | 2.12-4.11 |
| Bisphosphonates                                         | 592 (3.7)                      | 1,545 (2.4)                       | 1.62     | 1.46-1.79 |
| Vitamin D                                               | 974 (6.0)                      | 2,469 (3.8)                       | 1.71     | 1.58-1.86 |
| <b>Charlson Comorbidity Index</b>                       |                                |                                   |          |           |
| Median (25% perc./75% perc./range)                      | 1 (1/1/9)                      | 1 (1/1/9)                         | NA       | NA        |
| <b>Charlson Comorbidity Index (categories)</b>          |                                |                                   |          |           |
| 0                                                       | 334 (2.1)                      | 1,469 (2.3)                       | 1.00     | reference |
| 1-3                                                     | 14,927 (92.4)                  | 60,848 (94.6)                     | 1.09     | 0.98-1.22 |
| 4-6                                                     | 839 (5.2)                      | 1,921 (3.0)                       | 2.01     | 1.77-2.30 |
| 7-9                                                     | 60 (0.4)                       | 78 (0.1)                          | 3.62     | 2.65-4.94 |
| <b>Number of prescriptions ICS prior</b>                |                                |                                   |          |           |
| Median (25% perc./75% perc./range)                      | 26 (10/54/335)                 | 25 (10/51/528)                    | NA       | NA        |

Characteristics and co-medication of cases with **herpes zoster** and matched controls at the index date

|                                                         | No. of Cases (%)<br>(N=4,163) | No. of Controls (%)<br>(N=16,605) | Crude OR | 95% CI    |
|---------------------------------------------------------|-------------------------------|-----------------------------------|----------|-----------|
| Male                                                    | 1,414 (34.0)                  | 5,621 (33.9)                      | NA       | NA        |
| Female                                                  | 2,749 (66.0)                  | 10,984 (66.2)                     | NA       | NA        |
| <b>Age</b>                                              |                               |                                   |          |           |
| 18-39                                                   | 729 (17.5)                    | 2,923 (17.6)                      | NA       | NA        |
| 40-59                                                   | 1,353 (32.5)                  | 5,402 (32.5)                      | NA       | NA        |
| 60-79                                                   | 1,717 (41.2)                  | 6,884 (41.5)                      | NA       | NA        |
| ≥80                                                     | 364 (8.7)                     | 1,396 (8.4)                       | NA       | NA        |
| <b>Smoking status</b>                                   |                               |                                   |          |           |
| non                                                     | 2,118 (50.9)                  | 8,403 (50.6)                      | 1.00     | reference |
| current                                                 | 525 (12.6)                    | 2,234 (13.5)                      | 0.93     | 0.83-1.03 |
| ex                                                      | 1,466 (35.2)                  | 5,624 (33.9)                      | 1.04     | 0.96-1.12 |
| unknown                                                 | 54 (1.3)                      | 344 (2.1)                         | 0.60     | 0.44-0.81 |
| <b>Alcohol consumption<br/>(average units per week)</b> |                               |                                   |          |           |
| none                                                    | 1,931 (46.4)                  | 7,996 (48.2)                      | 1.00     | reference |
| <14                                                     | 1,410 (33.9)                  | 5,388 (32.5)                      | 1.09     | 1.01-1.17 |
| ≥14                                                     | 445 (10.7)                    | 1,654 (10.0)                      | 1.13     | 1.00-1.27 |
| unknown                                                 | 377 (9.1)                     | 1,567 (9.4)                       | 1.00     | 0.88-1.14 |
| <b>Body mass index, kg/m<sup>2</sup></b>                |                               |                                   |          |           |
| <18.5                                                   | 63 (1.5)                      | 203 (1.2)                         | 1.21     | 0.90-1.61 |
| 18.5-24.9                                               | 1,304 (31.3)                  | 5,060 (30.5)                      | 1.00     | reference |
| 25-29.9                                                 | 1,339 (32.2)                  | 5,377 (32.4)                      | 0.97     | 0.88-1.05 |
| ≥30                                                     | 1,130 (27.1)                  | 4,528 (27.3)                      | 0.97     | 0.88-1.06 |
| unknown                                                 | 327 (7.9)                     | 1,437 (8.7)                       | 0.87     | 0.76-1.01 |
| <b>Concomitant<sup>a</sup> drug use</b>                 |                               |                                   |          |           |
| SABA                                                    | 3,452 (82.9)                  | 13,901 (83.7)                     | 0.88     | 0.70-1.11 |
| SAMA                                                    | 156 (3.8)                     | 620 (3.7)                         | 1.01     | 0.84-1.22 |
| ICS (mono preparations)                                 | 3,004 (72.2)                  | 12,224 (73.6)                     | 0.99     | 0.85-1.17 |
| ICS+LABA                                                | 1,416 (34.0)                  | 5,250 (31.6)                      | 1.15     | 1.07-1.25 |
| Asthma add-on therapy <sup>b</sup>                      | 215 (5.2)                     | 703 (4.2)                         | 1.24     | 1.06-1.46 |
| Platelet aggregation inhibitors                         | 650 (15.6)                    | 2,337 (14.1)                      | 1.16     | 1.05-1.29 |
| Anticoagulants                                          | 149 (3.6)                     | 491 (3.0)                         | 1.22     | 1.01-1.48 |
| Proton pump inhibitors                                  | 1,050 (25.2)                  | 3,517 (21.2)                      | 1.32     | 1.21-1.44 |
| Immunosuppressants <sup>c</sup>                         | 17 (0.4)                      | 37 (0.2)                          | 1.84     | 1.04-3.26 |
| Bisphosphonates                                         | 151 (3.6)                     | 542 (3.3)                         | 1.13     | 0.93-1.36 |
| Vitamin D                                               | 210 (5.0)                     | 840 (5.1)                         | 0.99     | 0.85-1.17 |
| <b>Charlson Comorbidity Index</b>                       |                               |                                   |          |           |
| Median (25% perc./75% perc./range)                      | 1 (1/1/10)                    | 1 (1/1/8)                         | NA       | NA        |
| <b>Charlson Comorbidity Index<br/>(categories)</b>      |                               |                                   |          |           |
| 0                                                       | 88 (2.1)                      | 385 (2.3)                         | 1.00     | reference |
| 1-3                                                     | 3,877 (93.1)                  | 15,595 (93.9)                     | 1.10     | 0.88-1.36 |
| 4-6                                                     | 187 (4.5)                     | 595 (3.6)                         | 1.38     | 1.06-1.79 |
| 7-10                                                    | 11 (0.3)                      | 30 (0.2)                          | 1.60     | 0.85-3.04 |
| <b>Number of prescriptions ICS prior</b>                |                               |                                   |          |           |
| Median (25% perc./75% perc./range)                      | 29 (12/57/269)                | 29 (12/56/528)                    | NA       | NA        |

Characteristics and co-medication of cases with **type 2 diabetes mellitus** and matched controls at the index date

|                                                         | No. of Cases (%)<br>(N=5,189) | No. of Controls (%)<br>(N=20,715) | Crude OR | 95% CI    |
|---------------------------------------------------------|-------------------------------|-----------------------------------|----------|-----------|
| Male                                                    | 2,070 (39.9)                  | 8,256 (39.9)                      | NA       | NA        |
| Female                                                  | 3,119 (60.1)                  | 12,459 (60.1)                     | NA       | NA        |
| <b>Age</b>                                              |                               |                                   |          |           |
| 18-39                                                   | 653 (12.6)                    | 2,609 (12.6)                      | NA       | NA        |
| 40-59                                                   | 1,927 (37.1)                  | 7,728 (37.3)                      | NA       | NA        |
| 60-79                                                   | 2,252 (43.4)                  | 8,984 (43.4)                      | NA       | NA        |
| ≥80                                                     | 357 (6.9)                     | 1,394 (6.7)                       | NA       | NA        |
| <b>Smoking status</b>                                   |                               |                                   |          |           |
| non                                                     | 2,313 (44.6)                  | 10,373 (50.1)                     | 1.00     | reference |
| current                                                 | 751 (14.5)                    | 2,619 (12.6)                      | 1.29     | 1.18-1.42 |
| ex                                                      | 2,054 (39.6)                  | 7,318 (35.3)                      | 1.27     | 1.19-1.36 |
| unknown                                                 | 71 (1.4)                      | 405 (2.0)                         | 0.76     | 0.58-0.99 |
| <b>Alcohol consumption<br/>(average units per week)</b> |                               |                                   |          |           |
| none                                                    | 2,936 (56.6)                  | 9,296 (44.9)                      | 1.00     | reference |
| <14                                                     | 1,497 (28.9)                  | 7,079 (34.2)                      | 0.66     | 0.62-0.71 |
| ≥14                                                     | 519 (10.0)                    | 2,490 (12.0)                      | 0.63     | 0.57-0.71 |
| unknown                                                 | 237 (4.6)                     | 1,850 (8.9)                       | 0.39     | 0.33-0.45 |
| <b>Body mass index, kg/m<sup>2</sup></b>                |                               |                                   |          |           |
| <18.5                                                   | 15 (0.3)                      | 266 (1.3)                         | 0.72     | 0.42-1.23 |
| 18.5-24.9                                               | 464 (8.9)                     | 6,267 (30.3)                      | 1.00     | reference |
| 25-29.9                                                 | 1,294 (24.9)                  | 7,241 (35.0)                      | 2.47     | 2.21-2.77 |
| ≥30                                                     | 3,180 (61.3)                  | 5,312 (25.6)                      | 8.88     | 7.96-9.89 |
| unknown                                                 | 236 (4.6)                     | 1,629 (7.9)                       | 1.81     | 1.52-2.15 |
| <b>Concomitant<sup>a</sup> drug use</b>                 |                               |                                   |          |           |
| SABA                                                    | 4,485 (86.4)                  | 17,037 (82.2)                     | 1.32     | 1.05-1.65 |
| SAMA                                                    | 239 (4.6)                     | 676 (3.3)                         | 1.49     | 1.27-1.74 |
| ICS (mono preparations)                                 | 3,647 (70.3)                  | 15,030 (72.6)                     | 1.02     | 0.88-1.18 |
| ICS+LABA                                                | 1,879 (36.2)                  | 6,805 (32.9)                      | 1.19     | 1.11-1.28 |
| Asthma add-on therapy <sup>b</sup>                      | 259 (5.0)                     | 931 (4.5)                         | 1.13     | 0.98-1.30 |
| Platelet aggregation inhibitors                         | 998 (19.2)                    | 2,541 (12.3)                      | 1.92     | 1.76-2.10 |
| Anticoagulants                                          | 249 (4.8)                     | 569 (2.8)                         | 1.84     | 1.58-2.15 |
| Proton pump inhibitors                                  | 1,514 (29.2)                  | 4,218 (20.4)                      | 1.74     | 1.61-1.87 |
| Immunosuppressants <sup>c</sup>                         | 21 (0.4)                      | 44 (0.2)                          | 1.91     | 1.13-3.20 |
| Bisphosphonates                                         | 119 (2.3)                     | 639 (3.1)                         | 0.72     | 0.58-0.88 |
| Vitamin D                                               | 238 (4.6)                     | 929 (4.5)                         | 1.03     | 0.89-1.20 |
| <b>Charlson Comorbidity Index</b>                       |                               |                                   |          |           |
| Median (25% perc./75% perc./range)                      | 1 (1/1/6)                     | 1(1/1/7)                          | NA       | NA        |
| <b>Charlson Comorbidity Index<br/>(categories)</b>      |                               |                                   |          |           |
| 0                                                       | 122 (2.4)                     | 511 (2.5)                         | 1.00     | reference |
| 1-3                                                     | 4,963 (95.6)                  | 19,932 (96.2)                     | 1.05     | 0.87-1.26 |
| 4-6                                                     | 104 (2.0)                     | 268 (1.3)                         | 1.65     | 1.25-2.17 |
| 7                                                       | X                             | X                                 | NA       | NA        |
| <b>Number of prescriptions ICS prior</b>                |                               |                                   |          |           |
| Median (25% perc./75% perc./range)                      | 31 (13/59/372)                | 29 (12/55/604)                    | NA       | NA        |

Characteristics and co-medication of cases with **cataract** and matched controls at the index date

|                                                         | <b>No. of Cases (%)<br/>(N=5,327)</b> | <b>No. of Controls (%)<br/>(N=21,019)</b> | <b>Crude OR</b> | <b>95% CI</b> |
|---------------------------------------------------------|---------------------------------------|-------------------------------------------|-----------------|---------------|
| Male                                                    | 1,659 (31.1)                          | 6,507 (31.0)                              | NA              | NA            |
| Female                                                  | 3,668 (68.9)                          | 14,512 (69.0)                             | NA              | NA            |
| <b>Age</b>                                              |                                       |                                           |                 |               |
| 18-39                                                   | 50 (0.9)                              | 195 (0.9)                                 | NA              | NA            |
| 40-59                                                   | 536 (10.1)                            | 2,157 (10.3)                              | NA              | NA            |
| 60-79                                                   | 3,240 (60.8)                          | 12,975 (61.7)                             | NA              | NA            |
| ≥80                                                     | 1,501 (28.2)                          | 5,692 (27.1)                              | NA              | NA            |
| <b>Smoking status</b>                                   |                                       |                                           |                 |               |
| non                                                     | 2,524 (47.4)                          | 10,739 (51.1)                             | 1.00            | reference     |
| current                                                 | 382 (7.2)                             | 1,454 (6.9)                               | 1.12            | 0.99-1.27     |
| ex                                                      | 2,333 (43.8)                          | 8,388 (39.9)                              | 1.19            | 1.12-1.27     |
| unknown                                                 | 88 (1.7)                              | 438 (2.1)                                 | 0.84            | 0.66-1.07     |
| <b>Alcohol consumption<br/>(average units per week)</b> |                                       |                                           |                 |               |
| none                                                    | 2,892 (54.3)                          | 11,123 (52.9)                             | 1.00            | reference     |
| <14                                                     | 1,623 (30.5)                          | 6,480 (30.8)                              | 0.97            | 0.90-1.03     |
| ≥14                                                     | 475 (8.9)                             | 1,865 (8.9)                               | 0.98            | 0.87-1.10     |
| unknown                                                 | 337 (6.3)                             | 1,551 (7.4)                               | 0.83            | 0.73-0.94     |
| <b>Body mass index, kg/m<sup>2</sup></b>                |                                       |                                           |                 |               |
| <18.5                                                   | 90 (1.7)                              | 266 (1.3)                                 | 1.34            | 1.05-1.72     |
| 18.5-24.9                                               | 1,588 (29.8)                          | 6,316 (30.1)                              | 1.00            | reference     |
| 25-29.9                                                 | 1,898 (35.6)                          | 7,572 (36.0)                              | 1.00            | 0.93-1.08     |
| ≥30                                                     | 1,425 (26.8)                          | 5,394 (25.7)                              | 1.06            | 0.98-1.15     |
| unknown                                                 | 326 (6.1)                             | 1,471 (7.0)                               | 0.88            | 0.76-1.00     |
| <b>Concomitant<sup>a</sup> drug use</b>                 |                                       |                                           |                 |               |
| SABA                                                    | 4,394 (82.5)                          | 16,904 (80.4)                             | 1.27            | 1.05-1.55     |
| SAMA                                                    | 338 (6.4)                             | 1,274 (6.1)                               | 1.07            | 0.94-1.21     |
| ICS (mono preparations)                                 | 3,756 (70.5)                          | 15,278 (72.7)                             | 0.90            | 0.78-1.04     |
| ICS+LABA                                                | 1,877 (35.2)                          | 6,878 (32.7)                              | 1.15            | 1.07-1.23     |
| Asthma add-on therapy <sup>b</sup>                      | 233 (4.4)                             | 765 (3.6)                                 | 1.23            | 1.06-1.43     |
| Platelet aggregation inhibitors                         | 1,623 (30.5)                          | 5,193 (24.7)                              | 1.39            | 1.30-1.50     |
| Anticoagulants                                          | 343 (6.4)                             | 1,104 (5.3)                               | 1.23            | 1.08-1.39     |
| Proton pump inhibitors                                  | 1,720 (32.3)                          | 5,870 (27.9)                              | 1.27            | 1.18-1.36     |
| Immunosuppressants <sup>c</sup>                         | 25 (0.5)                              | 34 (0.2)                                  | 2.89            | 1.70-4.90     |
| Bisphosphonates                                         | 370 (7.0)                             | 1,302 (6.2)                               | 1.14            | 1.01-1.29     |
| Vitamin D                                               | 540 (10.4)                            | 1,842 (8.8)                               | 1.18            | 1.06-1.31     |
| <b>Charlson Comorbidity Index</b>                       |                                       |                                           |                 |               |
| Median (25% perc./75% perc./range)                      | 1 (1/2/10)                            | 1 (1/2/9)                                 | NA              | NA            |
| <b>Charlson Comorbidity Index<br/>(categories)</b>      |                                       |                                           |                 |               |
| 0                                                       | 78 (1.5)                              | 387 (1.8)                                 | 1.00            | reference     |
| 1-3                                                     | 4,670 (87.7)                          | 19,255 (91.6)                             | 1.23            | 0.98-1.53     |
| 4-6                                                     | 546 (10.3)                            | 1,327 (6.3)                               | 2.09            | 1.64-2.65     |
| 7-10                                                    | 33 (0.6)                              | 50 (0.2)                                  | 3.40            | 2.21-5.21     |
| <b>Number of prescriptions ICS</b>                      |                                       |                                           |                 |               |
| Median (25% perc./75% perc./range)                      | 41 (21/72/296)                        | 40 (20/69/350)                            | NA              | NA            |



Characteristics and co-medication of cases with **glaucoma** and matched controls at the index date

|                                                         | <b>No. of Cases (%)<br/>(N=1,467)</b> | <b>No. of Controls (%)<br/>(N=5,832)</b> | <b>Crude OR</b> | <b>95% CI</b> |
|---------------------------------------------------------|---------------------------------------|------------------------------------------|-----------------|---------------|
| Male                                                    | 544 (37.1)                            | 2,156 (37.0)                             | NA              | NA            |
| Female                                                  | 923 (62.9)                            | 3,676 (63.0)                             | NA              | NA            |
| <b>Age</b>                                              |                                       |                                          |                 |               |
| 18-39                                                   | 42 (2.9)                              | 171 (2.9)                                | NA              | NA            |
| 40-59                                                   | 302 (20.6)                            | 1,206 (20.7)                             | NA              | NA            |
| 60-79                                                   | 832 (56.7)                            | 3,335 (57.2)                             | NA              | NA            |
| ≥80                                                     | 291 (19.8)                            | 1,120 (19.2)                             | NA              | NA            |
| <b>Smoking status</b>                                   |                                       |                                          |                 |               |
| non                                                     | 753 (51.3)                            | 2,854 (48.9)                             | 1.00            | reference     |
| current                                                 | 132 (9.0)                             | 543 (9.3)                                | 0.92            | 0.75-1.14     |
| ex                                                      | 552 (37.6)                            | 2,279 (39.1)                             | 0.91            | 0.80-1.03     |
| unknown                                                 | 30 (2.0)                              | 156 (2.7)                                | 0.72            | 0.48-1.09     |
| <b>Alcohol consumption<br/>(average units per week)</b> |                                       |                                          |                 |               |
| none                                                    | 738 (50.3)                            | 2,913 (50.0)                             | 1.00            | reference     |
| <14                                                     | 481 (32.8)                            | 1,859 (31.9)                             | 1.03            | 0.90-1.17     |
| ≥14                                                     | 151 (10.3)                            | 590 (10.1)                               | 1.02            | 0.83-1.25     |
| unknown                                                 | 97 (6.6)                              | 470 (8.1)                                | 0.82            | 0.65-1.03     |
| <b>Body mass index, kg/m<sup>2</sup></b>                |                                       |                                          |                 |               |
| <18.5                                                   | 21 (1.4)                              | 68 (1.2)                                 | 1.22            | 0.74-2.01     |
| 18.5-24.9                                               | 447 (30.5)                            | 1,756 (30.1)                             | 1.00            | reference     |
| 25-29.9                                                 | 513 (35.0)                            | 2,029 (34.8)                             | 1.00            | 0.86-1.15     |
| ≥30                                                     | 393 (26.8)                            | 1,524 (26.1)                             | 1.02            | 0.88-1.20     |
| unknown                                                 | 93 (6.3)                              | 455 (7.8)                                | 0.79            | 0.62-1.02     |
| <b>Concomitant<sup>a</sup> drug use</b>                 |                                       |                                          |                 |               |
| SABA                                                    | 1,181 (80.5)                          | 4,748 (81.4)                             | 0.81            | 0.58-1.11     |
| SAMA                                                    | 98 (6.7)                              | 346 (5.9)                                | 1.13            | 0.89-1.44     |
| ICS (mono preparations)                                 | 1,083 (73.8)                          | 4,270 (73.2)                             | 1.00            | 0.75-1.33     |
| ICS+LABA                                                | 451 (30.7)                            | 1,876 (32.2)                             | 0.94            | 0.82-1.08     |
| Asthma add-on therapy <sup>b</sup>                      | 67 (4.6)                              | 211 (3.6)                                | 1.26            | 0.95-1.68     |
| Platelet aggregation inhibitors                         | 373 (25.4)                            | 1,268 (21.7)                             | 1.28            | 1.11-1.47     |
| Anticoagulants                                          | 69 (4.7)                              | 249 (4.3)                                | 1.08            | 0.82-1.43     |
| Proton pump inhibitors                                  | 389 (26.5)                            | 1,487 (25.5)                             | 1.04            | 0.90-1.19     |
| Immunosuppressants <sup>c</sup>                         | 6 (0.4)                               | 18 (0.3)                                 | 1.33            | 0.53-3.36     |
| Bisphosphonates                                         | 61 (4.2)                              | 294 (5.0)                                | 0.81            | 0.60-1.07     |
| Vitamin D                                               | 94 (6.4)                              | 390 (6.7)                                | 0.96            | 0.76-1.22     |
| <b>Charlson Comorbidity Index</b>                       |                                       |                                          |                 |               |
| Median (25% perc./75% perc./range)                      | 1 (1/2/8)                             | 1 (1/2/10)                               | NA              | NA            |
| <b>Charlson Comorbidity Index (categories)</b>          |                                       |                                          |                 |               |
| 0                                                       | 30 (2.0)                              | 120 (2.1)                                | 1.00            | reference     |
| 1-3                                                     | 1,333 (90.9)                          | 5,368 (92.0)                             | 1.00            | 0.69-1.44     |
| 4-6                                                     | 99 (6.8)                              | 326 (5.6)                                | 1.20            | 0.79-1.83     |
| 7-10                                                    | 5 (0.3)                               | 18 (0.3)                                 | 1.13            | 0.44-2.92     |
| <b>Number of prescriptions ICS prior</b>                |                                       |                                          |                 |               |
| Median (25% perc./75% perc./range)                      | 33 (15/60/241)                        | 36 (16/66/351)                           | NA              | NA            |

Characteristics and co-medication of cases with **chronic kidney disease** and matched controls at the index date

|                                                         | <b>No. of Cases (%)<br/>(N=8,778)</b> | <b>No. of Controls (%)<br/>(N=34,762)</b> | <b>Crude OR</b> | <b>95% CI</b> |
|---------------------------------------------------------|---------------------------------------|-------------------------------------------|-----------------|---------------|
| Male                                                    | 2,364 (26.9)                          | 9,254 (26.6)                              | NA              | NA            |
| Female                                                  | 6,414 (73.1)                          | 25,508 (73.4)                             | NA              | NA            |
| <b>Age</b>                                              |                                       |                                           |                 |               |
| 18-39                                                   | 170 (1.9)                             | 668 (1.9)                                 | NA              | NA            |
| 40-59                                                   | 1,062 (12.1)                          | 4,260 (12.3)                              | NA              | NA            |
| 60-79                                                   | 5,158 (58.8)                          | 20,727 (59.6)                             | NA              | NA            |
| ≥80                                                     | 2,388 (27.2)                          | 9,107 (26.2)                              | NA              | NA            |
| <b>Smoking status</b>                                   |                                       |                                           |                 |               |
| non                                                     | 4,132 (47.1)                          | 17,767 (51.1)                             | 1.00            | reference     |
| current                                                 | 622 (7.1)                             | 2,710 (7.8)                               | 0.99            | 0.90-1.09     |
| ex                                                      | 3,925 (44.7)                          | 13,713 (39.5)                             | 1.24            | 1.18-1.31     |
| unknown                                                 | 99 (1.1)                              | 572 (1.7)                                 | 0.73            | 0.58-0.91     |
| <b>Alcohol consumption<br/>(average units per week)</b> |                                       |                                           |                 |               |
| none                                                    | 5,172 (58.9)                          | 17,924 (51.6)                             | 1.00            | reference     |
| <14                                                     | 2,633 (30.0)                          | 11,103 (31.9)                             | 0.82            | 0.77-0.86     |
| ≥14                                                     | 565 (6.4)                             | 3,024 (8.7)                               | 0.63            | 0.57-0.70     |
| unknown                                                 | 408 (4.7)                             | 2,711 (7.8)                               | 0.52            | 0.46-0.58     |
| <b>Body mass index, kg/m<sup>2</sup></b>                |                                       |                                           |                 |               |
| <18.5                                                   | 104 (1.2)                             | 532 (1.5)                                 | 1.00            | 0.80-1.24     |
| 18.5-24.9                                               | 2,061 (23.5)                          | 10,893 (31.3)                             | 1.00            | reference     |
| 25-29.9                                                 | 3,140 (35.8)                          | 12,285 (35.3)                             | 1.39            | 1.31-1.48     |
| ≥30                                                     | 3,074 (35.0)                          | 8,432 (24.3)                              | 2.03            | 1.90-2.17     |
| unknown                                                 | 399 (4.6)                             | 2,620 (7.5)                               | 0.77            | 0.69-0.87     |
| <b>Concomitant<sup>a</sup> drug use</b>                 |                                       |                                           |                 |               |
| SABA                                                    | 7,241 (82.5)                          | 28,138 (80.9)                             | 0.94            | 0.82-1.09     |
| SAMA                                                    | 662 (7.5)                             | 2,015 (5.8)                               | 1.34            | 1.23-1.48     |
| ICS (mono preparations)                                 | 6,390 (72.8)                          | 25,978 (74.7)                             | 0.79            | 0.70-0.88     |
| ICS+LABA                                                | 2,981 (34.0)                          | 10,886 (31.3)                             | 1.14            | 1.08-1.20     |
| Asthma add-on therapy <sup>b</sup>                      | 346 (3.9)                             | 1,320 (3.8)                               | 1.04            | 0.92-1.17     |
| Platelet aggregation inhibitors                         | 3,188 (36.3)                          | 7,773 (22.4)                              | 2.21            | 2.09-2.33     |
| Anticoagulants                                          | 710 (8.1)                             | 1,352 (3.9)                               | 2.22            | 2.02-2.45     |
| Proton pump inhibitors                                  | 2,952 (33.6)                          | 8,554 (24.6)                              | 1.61            | 1.53-1.70     |
| Immunosuppressants <sup>c</sup>                         | 35 (0.4)                              | 66 (0.2)                                  | 2.10            | 1.40-3.17     |
| Bisphosphonates                                         | 548 (6.2)                             | 2,153 (6.2)                               | 1.00            | 0.90-1.10     |
| Vitamin D                                               | 805 (9.2)                             | 2,774 (8.0)                               | 1.18            | 1.08-1.28     |
| <b>Charlson Comorbidity Index</b>                       |                                       |                                           |                 |               |
| Median (25% perc./75% perc./range)                      | 1 (1/2/8)                             | 1 (1/1/8)                                 | NA              | NA            |
| <b>Charlson Comorbidity Index<br/>(categories)</b>      |                                       |                                           |                 |               |
| 0                                                       | 183 (2.1)                             | 786 (2.3)                                 | 1.00            | reference     |
| 1-3                                                     | 8,004 (91.2)                          | 33,166 (95.4)                             | 1.04            | 0.90-1.21     |
| 4-6                                                     | 572 (6.5)                             | 798 (2.3)                                 | 3.14            | 2.63-3.73     |
| 7-9                                                     | 19 (0.2)                              | 12 (0.0)                                  | 7.43            | 4.07-13.55    |
| <b>Number of prescriptions ICS prior</b>                |                                       |                                           |                 |               |
| Median (25% perc./75% perc./range)                      | 37 (17/66/412)                        | 36 (17/64/363)                            | NA              | NA            |

Characteristics and co-medication of cases with **affective disorders** and matched controls at the index date

|                                                         | No. of Cases (%)<br>(N=4,962) | No. of Controls (%)<br>(N=19,809) | Crude OR | 95% CI    |
|---------------------------------------------------------|-------------------------------|-----------------------------------|----------|-----------|
| Male                                                    | 1,874 (37.8)                  | 7,479 (37.8)                      | NA       | NA        |
| Female                                                  | 3,088 (62.2)                  | 12,330 (62.2)                     | NA       | NA        |
| <b>Age</b>                                              |                               |                                   |          |           |
| 18-39                                                   | 2,586 (52.1)                  | 10,316 (52.1)                     | NA       | NA        |
| 40-59                                                   | 1,665 (33.6)                  | 6,657 (33.6)                      | NA       | NA        |
| 60-79                                                   | 579 (11.7)                    | 2,328 (11.8)                      | NA       | NA        |
| ≥80                                                     | 132 (2.7)                     | 508 (2.6)                         | NA       | NA        |
| <b>Smoking status</b>                                   |                               |                                   |          |           |
| non                                                     | 2,268 (45.7)                  | 11,305 (57.1)                     | 1.00     | reference |
| current                                                 | 1,247 (25.1)                  | 3,129 (15.8)                      | 2.01     | 1.86-2.18 |
| ex                                                      | 1,316 (26.5)                  | 4,727 (23.9)                      | 1.38     | 1.28-1.50 |
| unknown                                                 | 131 (2.6)                     | 648 (3.3)                         | 1.01     | 0.83-1.24 |
| <b>Alcohol consumption<br/>(average units per week)</b> |                               |                                   |          |           |
| none                                                    | 2,099 (42.3)                  | 7,768 (39.2)                      | 1.00     | reference |
| <14                                                     | 1,613 (32.5)                  | 6,519 (32.9)                      | 0.92     | 0.85-0.99 |
| ≥14                                                     | 565 (11.4)                    | 2,145 (10.8)                      | 0.97     | 0.87-1.08 |
| unknown                                                 | 685 (13.8)                    | 3,377 (17.1)                      | 0.73     | 0.66-0.80 |
| <b>Body mass index, kg/m<sup>2</sup></b>                |                               |                                   |          |           |
| <18.5                                                   | 127 (2.6)                     | 387 (2.0)                         | 1.43     | 1.16-1.76 |
| 18.5-24.9                                               | 1,627 (32.8)                  | 7,197 (36.3)                      | 1.00     | reference |
| 25-29.9                                                 | 1,366 (27.5)                  | 5,414 (27.3)                      | 1.13     | 1.04-1.22 |
| ≥30                                                     | 1,202 (24.2)                  | 3,919 (19.8)                      | 1.38     | 1.26-1.50 |
| unknown                                                 | 640 (12.9)                    | 2,892 (14.6)                      | 0.96     | 0.86-1.06 |
| <b>Concomitant<sup>a</sup> drug use</b>                 |                               |                                   |          |           |
| SABA                                                    | 4,403 (88.7)                  | 17,039 (86.0)                     | 1.81     | 1.35-2.44 |
| SAMA                                                    | 124 (2.5)                     | 327 (1.7)                         | 1.57     | 1.26-1.94 |
| ICS (mono preparations)                                 | 3,692 (74.4)                  | 15,096 (76.2)                     | 0.94     | 0.81-1.10 |
| ICS+LABA                                                | 1,602 (32.3)                  | 5,709 (28.8)                      | 1.23     | 1.14-1.32 |
| Asthma add-on therapy <sup>b</sup>                      | 236 (4.8)                     | 718 (3.6)                         | 1.34     | 1.15-1.56 |
| Platelet aggregation inhibitors                         | 304 (6.1)                     | 805 (4.1)                         | 1.73     | 1.48-2.01 |
| Anticoagulants                                          | 64 (1.3)                      | 166 (0.8)                         | 1.58     | 1.17-2.12 |
| Proton pump inhibitors                                  | 694 (14.0)                    | 1,685 (8.5)                       | 1.93     | 1.75-2.14 |
| Immunosuppressants <sup>c</sup>                         | 8 (0.2)                       | 27 (0.1)                          | 1.19     | 0.54-2.61 |
| Bisphosphonates                                         | 64 (1.3)                      | 180 (0.9)                         | 1.45     | 1.07-1.95 |
| Vitamin D                                               | 93 (1.9)                      | 313 (1.6)                         | 1.21     | 0.95-1.55 |
| <b>Charlson Comorbidity Index</b>                       |                               |                                   |          |           |
| Median (25% perc./75% perc./range)                      | 1 (1/1/10)                    | 1 (1/1/8)                         | NA       | NA        |
| <b>Charlson Comorbidity Index (categories)</b>          |                               |                                   |          |           |
| 0                                                       | 107 (2.2)                     | 400 (2.0)                         | 1.00     | reference |
| 1-3                                                     | 4,772 (96.2)                  | 19,214 (97.0)                     | 0.93     | 0.77-1.13 |
| 4-6                                                     | 80 (1.6)                      | 191 (1.0)                         | 1.60     | 1.18-2.17 |
| 7-10                                                    | X                             | X                                 | NA       | NA        |
| <b>Number of prescriptions ICS prior</b>                |                               |                                   |          |           |
| Median (25% perc./75% perc./range)                      | 21 (8/45/358)                 | 21 (8/44/348)                     | NA       | NA        |

Characteristics and co-medication of cases with **cardiovascular disease** and matched controls at the index date

|                                                         | No. of Cases (%)<br>(N=4,014) | No. of Controls (%)<br>(N=15,945) | Crude<br>OR | 95% CI    |
|---------------------------------------------------------|-------------------------------|-----------------------------------|-------------|-----------|
| Male                                                    | 1,885 (47.0)                  | 7,477 (46.9)                      | NA          | NA        |
| Female                                                  | 2,129 (53.0)                  | 8,468 (53.1)                      | NA          | NA        |
| <b>Age</b>                                              |                               |                                   |             |           |
| 18-39                                                   | 66 (1.6)                      | 265 (1.7)                         | NA          | NA        |
| 40-59                                                   | 977 (24.3)                    | 3,913 (24.5)                      | NA          | NA        |
| 60-79                                                   | 2,274 (56.7)                  | 9,087 (57.0)                      | NA          | NA        |
| ≥80                                                     | 697 (17.4)                    | 2,680 (16.8)                      | NA          | NA        |
| <b>Smoking status</b>                                   |                               |                                   |             |           |
| non                                                     | 1,746 (43.5)                  | 7,954 (49.9)                      | 1.00        | reference |
| current                                                 | 544 (13.6)                    | 1,495 (9.4)                       | 1.70        | 1.51-1.90 |
| ex                                                      | 1,622 (40.4)                  | 6,046 (37.9)                      | 1.23        | 1.14-1.33 |
| unknown                                                 | 102 (2.5)                     | 450 (2.8)                         | 1.03        | 0.82-1.29 |
| <b>Alcohol consumption<br/>(average units per week)</b> |                               |                                   |             |           |
| none                                                    | 2,048 (51.0)                  | 7,294 (45.7)                      | 1.00        | reference |
| <14                                                     | 1,311 (32.7)                  | 5,243 (32.9)                      | 0.89        | 0.82-0.96 |
| ≥14                                                     | 427 (10.6)                    | 1,973 (12.4)                      | 0.76        | 0.67-0.85 |
| unknown                                                 | 228 (5.7)                     | 1,435 (9.0)                       | 0.56        | 0.48-0.65 |
| <b>Body mass index, kg/m<sup>2</sup></b>                |                               |                                   |             |           |
| <18.5                                                   | 39 (1.0)                      | 192 (1.2)                         | 0.96        | 0.68-1.37 |
| 18.5-24.9                                               | 994 (24.8)                    | 4,744 (29.8)                      | 1.00        | reference |
| 25-29.9                                                 | 1,525 (38.0)                  | 5,762 (36.1)                      | 1.27        | 1.16-1.39 |
| ≥30                                                     | 1,142 (28.5)                  | 3,777 (23.7)                      | 1.47        | 1.33-1.62 |
| unknown                                                 | 314 (7.8)                     | 1,470 (9.2)                       | 1.00        | 0.87-1.16 |
| <b>Concomitant<sup>a</sup> drug use</b>                 |                               |                                   |             |           |
| SABA                                                    | 3,368 (83.9)                  | 12,932 (81.1)                     | 1.05        | 0.85-1.29 |
| SAMA                                                    | 277 (6.9)                     | 798 (5.0)                         | 1.44        | 1.25-1.66 |
| ICS (mono preparations)                                 | 3,053 (76.1)                  | 12,403 (77.8)                     | 0.89        | 0.75-1.07 |
| ICS+LABA                                                | 1,213 (30.2)                  | 4,337 (27.2)                      | 1.22        | 1.12-1.32 |
| Asthma add-on therapy <sup>b</sup>                      | 160 (4.0)                     | 542 (3.4)                         | 1.19        | 0.99-1.43 |
| Platelet aggregation inhibitors                         | 1,394 (34.7)                  | 2,091 (13.1)                      | 4.00        | 3.67-4.36 |
| Anticoagulants                                          | 200 (5.0)                     | 462 (2.9)                         | 1.79        | 1.51-2.13 |
| Proton pump inhibitors                                  | 1,226 (30.5)                  | 3,362 (21.1)                      | 1.80        | 1.66-1.96 |
| Immunosuppressants <sup>c</sup>                         | 12 (0.3)                      | 21 (0.1)                          | 2.29        | 1.13-4.65 |
| Bisphosphonates                                         | 167 (4.2)                     | 627 (3.9)                         | 1.08        | 0.90-1.29 |
| Vitamin D                                               | 269 (6.7)                     | 872 (5.5)                         | 1.27        | 1.09-1.47 |
| <b>Charlson Comorbidity Index</b>                       |                               |                                   |             |           |
| Median (25% perc./75% perc./range)                      | 1 (1/2/7)                     | 1 (1/1/8)                         | NA          | NA        |
| <b>Charlson Comorbidity Index (categories)</b>          |                               |                                   |             |           |
| 0                                                       | 101 (2.5)                     | 398 (2.5)                         | 1.00        | reference |
| 1-3                                                     | 3,651 (91.0)                  | 14,974 (93.9)                     | 0.97        | 0.80-1.19 |
| 4-6                                                     | 249 (6.2)                     | 562 (3.5)                         | 1.77        | 1.39-2.24 |
| 7-8                                                     | 13 (0.3)                      | 11 (0.1)                          | 4.62        | 2.21-9.68 |
| <b>Number of prescriptions ICS prior</b>                |                               |                                   |             |           |
| Median (25% perc./75% perc./range)                      | 34 (14/63/257)                | 33 (14/60/408)                    | NA          | NA        |

**Abbreviations for all characteristics and co-medication tables:** LABA, long-acting beta-adrenoceptor agonists; ICS, inhaled corticosteroids; SABA, short-acting beta-adrenoceptor agonists; SAMA, short-acting muscarinic antagonists; LAMA, long-acting muscarinic antagonists; NA, not applicable; X: cell contained <5 observations (due to confidentiality reasons, we are not allowed to display cells containing <5 observations); perc., percentile.

<sup>a</sup> Last prescription within 365 days before the index date; reference group: non-users of these drug groups.

<sup>b</sup> Theophylline, leukotriene receptor antagonists, or omalizumab.

<sup>c</sup> Selective immunosuppressants, tumor necrosis factor alpha inhibitors, interleukin inhibitors, calcineurin inhibitors, azathioprine, thalidomide, lenalidomide, or methotrexate.
